# Supplementary material for: An Alcaligenes strain emulates Bacillus thuringiensis producing a binary protein that kills corn rootworm through a mechanism similar to Cry34Ab1/Cry35Ab1
Source: PubMed Central journal article supplement (PMC5465095; doi:10.1038/s41598-017-03544-9), 2017-06-08
Supplement: 41598_2017_3544_MOESM1_ESM.pdf [file 41598_2017_3544_MOESM1_ESM.pdf]

1 **Supplementary Information**

2

3 **An *Alcaligenes* strain emulates *Bacillus thuringiensis* producing a binary protein that kills corn**  
4 **rootworm through a mechanism similar to Cry34Ab1/Cry35Ab1**

5

6 Nasser Yalpani<sup>1\*</sup>, Dan Altier<sup>1</sup>, Jennifer Barry<sup>1</sup>, Adane Kassa<sup>1</sup>, Timothy M. Nowatzki<sup>1</sup>, Amit Sethi<sup>1</sup>, Jian-  
7 Zhou Zhao<sup>1</sup>, Scott Diehn<sup>1</sup>, Virginia Crane<sup>1</sup>, Gary Sandahl<sup>1</sup>, Rongjin Guan<sup>3</sup>, Brad Poland<sup>1</sup>, Claudia Pérez  
8 Ortega<sup>1</sup>, Mark E. Nelson<sup>1</sup>, Weiping Xie<sup>2</sup>, Lu Liu<sup>2</sup> & Gusui Wu<sup>1</sup>

9

10 <sup>1</sup>DuPont Pioneer, Johnston, IA 50131 USA; <sup>2</sup>DuPont Pioneer, Hayward, CA 94545 USA; <sup>3</sup>Nexomics  
11 Biosciences, Bordentown, NJ 08505 USA.

12

13 Corresponding author: Nasser Yalpani, DuPont Pioneer, 7300 NW 62<sup>nd</sup> Ave., Johnston IA 50131-1004,  
14 U.S.A.

15 Telephone: 515-535-4391

16 e-mail: [nasser.yalpani@pioneer.com](mailto:nasser.yalpani@pioneer.com)

17

18 **Supplementary Methods**

19

20 **AfIP-1A and AfIP-1B homologs from *A. faecalis* accessions.** Strains purchased from the American Type  
21 Culture Collection and the USDA ARS NRRL Culture Collection were cultured, lysed and screened for  
22 activity against WCR. Their genome sequence was generated as described above. The DNA sequences of  
23 homologs of AfIP-1A and AfIP-1B that were identified have been deposited in the GenBank of the  
24 National Center for Biotechnology Information under the accession numbers listed in Supplementary  
25 Table S2.

26

27 **Greenhouse testing of transgenic maize.** T0 events were infested with 800 WCR eggs per plant at the  
28 V3 to V4 stage (3 to 4 collared leaves) and root injury visually assessed at ~V7 using the Iowa State 0-3  
29 node-injury scale<sup>1</sup>.

30

31 **Field testing transgenic maize.** Second-generation (T2) hybrid maize seed derived from construct  
32 ZmAfIP1A/1B, with four independent transformation events, was tested at three U.S. locations in 2012.  
33 Field trials were conducted on land that contained late-planted conventional maize the previous season

34 to attract corn rootworm beetles for egg laying and to enhance natural infestations. Plots at all locations  
35 were also manually infested with 750 wild-type WCR eggs per plant (French Agricultural Research, Inc.,  
36 Lambert, MN) using mechanical infesters when plants were between growth stages V2 and V4.

37 The experimental unit was a single-row plot of corn 5.3 m in length and a row spacing of 76.2 cm.  
38 Treatments were arranged in a randomized complete block experimental design and replicated 3 times  
39 at each location. Treatments included four events from construct ZmAfIP1A/1B, 2 entries of the  
40 commercial event DAS-59122-7 as the positive control, and two non-transgenic negative control entries.  
41 All treatments were tested in the same hybrid background. A seed treatment containing the fungicidal  
42 active ingredients fludioxonil and metalaxyl, and the insecticide, thiamethoxam, at a rate of 0.25 mg  
43 a.i./kernel (Cruiser<sup>®</sup> 250; Syngenta Crop Protection, Inc., Greensboro, NC) was applied to seeds in all  
44 treatments. This is the labeled rate for control of certain secondary insect pests of corn but does not  
45 provide control of corn rootworm.

46 The four experimental events from ZmAfIP1A/1B were sprayed with Ignite<sup>®</sup> 280SL (24.5%  
47 glufosinate, Syngenta Crop Protection Inc., Greensboro, NC) at a rate of 1.6 L/ha when plants were  
48 between growth stages V2 and V5 to remove any plants not containing the events of interest.  
49 Additionally, plants were leaf sampled prior to root evaluation and analyzed for copy number of the  
50 transgenes of interest. Only plants containing single copies of the *AfIP-1A* and *AfIP-1B* genes were  
51 included in the statistical analysis.

52 Root injury was evaluated by digging a sub-sample of 5 roots per plot, washing the root systems  
53 clean of soil, and then visually assessing the amount of corn rootworm larval injury using the Iowa State  
54 0-3 node-injury scale<sup>1</sup>. The testing locations, dates of key activities, and levels of corn rootworm larval  
55 feeding pressure are shown in Supplementary Table S3.

56

57 A linear mixed model was applied to model node-injury scores across locations. To meet a model  
58 assumption of normality and equal variance, square root transformation was applied to node-injury  
59 scores for data analysis. Data for square-root transformed node-injury score ( $Y_{ijm nks}$ ) of location ( $L$ )<sub>*i*</sub>,  
60 replication ( $R$ )<sub>*j*</sub>, construct ( $P$ )<sub>*m*</sub>, event ( $E$ )<sub>*n*</sub>, plot ( $K$ )<sub>*k*</sub> and plant *s*, were modeled as a function of an overall  
61 mean  $\mu$ , factors for location, location by replication, treatment, event nested within treatment, location  
62 by treatment, location by event nested within treatment, plot within each location ( $K/L$ )<sub>*ik*</sub> and a  
63 residual within each location ( $\epsilon/L$ )<sub>*ijm nks*</sub>. The model can be specified as:

$$Y_{ijm nks} = \mu + \underline{L_i} + \underline{(L \times R)_{ij}} + P_m + (P \times E)_{mn} + \underline{(L \times P)_{im}} + \underline{(L \times P \times E)_{imn}} + \underline{(K/L)_{ik}} \\ + \underline{(\epsilon/L)_{ijm nks}}$$

64 where treatment and event nested within treatment were treated as fixed effects, and all the other  
65 effects were treated as independent normally distributed random variables with means of zero. Results  
66 across locations were back-transformed to original scales and reported in Fig. 1. An additional by-  
67 location analysis using a linear mixed model was conducted to examine node-injury scores for each  
68 location. Data for square-root transformed node-injury score ( $Y_{imnks}$ ) of replication ( $R_i$ ), treatment ( $P_m$ ),  
69 event ( $E_n$ ), plot ( $K_k$ ) and plant  $s$ , were modeled as a function of an overall mean  $\mu$ , factors for replication,  
70 treatment, event nested within treatment, plot and a residual  $\varepsilon_{imnks}$ . The model can be specified as:

$$Y_{imnks} = \mu + \underline{R_i} + P_m + (P \times E)_{mn} + \underline{K_k} + \underline{\varepsilon_{imnks}}$$

71 where treatment and event nested within treatment were treated as fixed effects, and all the other  
72 effects were treated as independent normally distributed random variables with means of zero. In both  
73 analyses,  $F$ -tests were used to assess significance for fixed effects.  $T$ -tests using standard errors from the  
74 model were conducted to compare treatment (construct and event) effects. Differences were  
75 considered statistically significant if the  $P$ -value of the difference was less than 0.05. Results by location  
76 were back-transformed to original scales and reported in Supplementary Table S4. All data analysis and  
77 comparisons were made in ASReml 3.0 (VSN International, Hemel Hempstead, UK, 2009).

78

79 **Binding assays with WCR midgut brush border membrane vesicles (BBMV).** Midguts were harvested  
80 from maize-fed third instar larvae and used for BBMV preparations for binding assays as described  
81 previously<sup>2</sup>. To track binding, proteins were labeled with Alexafluor 488<sup>®</sup> (Thermo Scientific) according  
82 to manufacturer's recommendations. To simulate the natural processing of the proteins by WCR gut  
83 enzymes, AfIP-1A/1B Cry34/35 were processed as follows: Full-length AfIP-1A (1-2 mg/ml) and AfIP-1B  
84 (1-2 mg/ml) were incubated with agarose-immobilized TPCK-treated trypsin (Thermo Scientific) at a 1:2  
85 (v:v) ratio of protein:trypsin in PBS buffer, pH 7.4, containing 0.1% Tween 20, in Handee-spin columns  
86 (Pierce) at 37 °C for 2 h. Processing of AfIP-1A results in an N-terminally truncated product that runs  
87 close to 16 kDa in denaturing gels. Trypsinization of AfIP-1B results in the appearance of a ~40 kDa N-  
88 terminal fragment and a ~37 kDa C-terminal fragment of the protein on denaturing gels (as is also  
89 observed following incubation in WCR gut fluid). Trypsinized AfIP-1A/1B retains insecticidal activity  
90 against WCR (data not shown). Processing of full-length Cry34Ab1 by soluble TLCK-chymotrypsin (Sigma  
91 Aldrich) was performed in processing buffer (50 mM NaCl, 20 mM Tris, pH 8.5) using a 100:1 (w:w) ratio  
92 of protein:chymotrypsin, at 37 °C for 15 min. Processing of full-length Cry35Ab1 by soluble TLCK-  
93 chymotrypsin was performed in the same buffer as Cry34Ab1, but using a ratio of 50:1 (w:w)  
94 protein:chymotrypsin, at 25 °C overnight. Reactions were stopped using 1 mM phenylmethanesulfonyl  
95 fluoride (G-Biosciences). Proteins were dialyzed into binding buffer prior to binding assessments. The

96 processing of Cry34Ab1 results in an N-terminally truncated form that runs close to 15 kDa in denaturing  
97 gels. Purification of processed proteins was not needed to achieve specific binding. Prior to binding  
98 experiments, proteins were quantified by gel densitometry following Simply Blue® (Thermo Scientific)  
99 staining of SDS-PAGE resolved samples that included BSA as standards. Specific binding of AfIP-1A/AfIP-  
100 1B and competition binding assays were conducted essentially as described previously<sup>2</sup>. We determined  
101 that specific binding of Alexa-labeled AfIP-1B to WCR BBMVs requires the presence of AfIP-1A (data not  
102 shown). Specificity of binding was demonstrated by elimination of Alexa-labeled AfIP-1B binding in the  
103 presence of saturating concentrations of unlabeled AfIP-1B (see Fig. 2A and C). Competition against  
104 binding of modified Cry3A protein, IP-3H9<sup>2,3</sup>, was characterized in a PBS Binding Buffer (PBS, pH 7.2,  
105 0.1% Tween20®, protease inhibitor cocktail [Roche Diagnostics]). Competition of AfIP-1A/1B against  
106 Cry34/Cry35 was assessed in a Bis-Tris Binding Buffer (20 mM Bis-Tris, pH 6, 100 mM KCl, 0.1%  
107 Tween20®, protease inhibitor cocktail) as it provided favorable solubility conditions for the proteins.  
108 Signals from triplicate experiments each consisting of 2 or 3 determinations were averaged and reported  
109 as normalized specific binding which was calculated by subtracting the nonspecific binding signal from  
110 all densitometry values for that experiment. The non-specific binding signal was defined as the  
111 fluorescence remaining in the presence of saturating concentrations of homologous competitor for each  
112 labeled protein. When specific binding was reflected by more than one protein band, densitometry  
113 values for the most intense band were used to quantify binding.

114  
115 **Expression and purification of AfIP-1A(I20M, T135M).** Multi-wavelength anomalous diffraction (MAD)  
116 provides a means to solve the phase problem in protein crystallography. The incorporation of seleno-  
117 methionine (SeMet) residues into proteins is a common practice. However, wild-type AfIP-1A protein  
118 has only an N-terminal Met. We generated the double mutant I20M and T135M by site-directed  
119 mutagenesis and expressed C-term-6x-His tagged AfIP-1A(I20M, T135M) in BL21 Gold and used IMAC to  
120 purify the protein. The purified double mutant showed WCR activity that was comparable to the tagged  
121 wild-type protein in diet assays (Supplementary Fig. S3). For SeMet incorporation C-term-6x-His tagged  
122 AfIP-1A(I20M, T135M) was expressed in T7 Express Crystal cells (New England BioLabs®). Starter cultures  
123 were grown overnight in Hi-Def Azure media (Teknova), 1% glucose, 15 µg/ml kanamycin, 50 µg/ml L-  
124 methionine at 200 rpm until the OD reached ~0.8 AU, the cells were pelleted and resuspended in the  
125 same media lacking Met and grown for an additional 2.5 h at 37 °C. L-seleno-methionine was then  
126 added to a final 66 µg/ml and the temperature adjusted to 16 °C. After 30 min IPTG was added to 0.5  
127 mM and the cultures were grown at 150 rpm overnight. Cells were lysed in 2xPBS containing EDTA-free  
128 proteinase inhibitors (Roche) using a TS-series cell disruptor (Constant Systems Inc.) and the lysate

129 clarified by centrifugation. The supernatant was loaded onto a 100 ml Talon Superflow IMAC column (GE  
130 Healthcare) equilibrated in 2xPBS. The column was washed extensively with 2xPBS, 6 mM imidazole and  
131 protein eluted with 2xPBS, 150 mM imidazole. The eluate was further purified using a 20 ml SuperQ-  
132 5PW anion exchange column (Tosoh Bioscience LLC) equilibrated in 20 mM MOPS, pH 7.1, and eluted  
133 with a 12 CV 0 to 300 mM NaCl gradient in this buffer. Further purification was achieved by  
134 chromatography with a 26/60 HiLoad S200 Prep Grade (GE Healthcare) column in PBS, 1 mM DTT.  
135 Eluted AfIP-1A was lyophilized and brought to a final concentration of 16.7 mg/ml in PBS, 10 mM Tris, 1  
136 mM DTT. MS analysis of the purified protein revealed complete SeMet incorporation [Expected mass of  
137 labeled AfIP-1A(I20M, T135M) if N-terminal methionine is absent is 17,173.7 Da; the observed mass was  
138 17,173.8 Da]. Static light scattering data were collected on a miniDAWN (TREOS) light scattering  
139 instrument (Wyatt Technology) coupled with an analytical gel filtration column (Protein KW-802.5,  
140 Shodex, Japan) with AfIP-1A at 16.15 mg/ml. All measurements were performed in 10 mM Tris-HCl, pH  
141 8, 100 mM NaCl, 1 mM TCEP at room temperature and with a flow rate of 0.5 ml/min. Data analysis  
142 using the ASTRA software package (Wyatt Technology) showed that under these conditions AfIP-1A is  
143 >98% monodisperse with an estimated mass 32.62 kDa.

144  
145 **Crystallization and Structure determination of AfIP-1A.** Initial high-throughput crystallization screening  
146 was carried out by micro batch method using screening kits both from Hampton Research and self-made  
147 covering 1,536 conditions, with the AfIP-1A protein concentration at 7.98 mg/ml. The experiments were  
148 set up at 4 °C for the first week and then transferred to 22 °C from the second week. The screening  
149 identified a number of crystallization conditions which yielded protein crystals, and then these  
150 conditions were further optimized manually by fine tuning the concentration of both protein solution  
151 and precipitants as well as the pH. Diffraction quality crystals were obtained in 0.1 M Hepes, pH 7.0, 10%  
152 PEG 1000 and 0.1 M sodium malonate. Seven diffraction datasets were collected on six crystals at the  
153 National Light Source, Brookhaven National Laboratory. The space group was determined to be  $P2_1$   
154 monoclinic with unit cell dimensions of  $a=59.29 \text{ \AA}$ ,  $b=34.42 \text{ \AA}$ ,  $c=71.44 \text{ \AA}$ ,  $\alpha= \gamma =90.0^\circ$ ,  $\beta=96.54^\circ$ . The  
155 asymmetric unit contains two molecules, each with two Se atoms. Therefore there are four Se atoms in  
156 the asymmetric unit whose anomalous light scattering was used to obtain initial phase information by  
157 SAD (single-wavelength anomalous dispersion/diffraction) method. The *Crank* program from the CCP4  
158 suite (4) was used to locate the Se atom positions (*Crunch2*), calculate initial SAD phases (*BP3*),  
159 determine hand (*Solomon*) and improve phases by density modification (*Parrot*). The CCP4 program  
160 *Buccaneer* allowed building a partial structure. This was followed by manual model building and  
161 adjusting with *Coot*. Structure refinement was carried out using *Refmac5*. The structure was refined

162 against the 1.8 Å resolution data to final R and R-free factors of 21.51% and 26.76%, respectively  
163 (Supplementary Table S7). The overall quality of the structure model is very good (Molprobit and  
164 Ramachandran, Supplementary Table S7). Several residues in surface loops have very weak electron  
165 densities, therefore it is not possible to define the structure in these regions. The four outliers in the  
166 Ramachandran plot, residues 129 and 131, in both molecules are located in a very flexible surface loop.  
167 Supplementary Table S8 contains additional structure refinement and validation statistics.

168 The structure of AfIP-1A is a dimer with monomers consisting of 11 beta strands with one short  $\alpha$ -  
169 helix at the N-terminus (Fig. 4A). The N-terminal 8 residues in both monomers are missing from the  
170 model due to missing electron density in this region, indicative of a highly flexible N-terminal  
171 polypeptide. Three surface loops, residues 77-82, 103-109 and 128-131 are also highly mobile with weak  
172 or missing electron density. The monomer structures are virtually identical except for the above three  
173 surface loops and the flexible N-terminal polypeptide segment. Superposition of the two monomers on  
174 C $\alpha$  atoms gave an RMSD of 0.0906 Å (calculated with *LSQKAB*) over 118 residues.

175 The dimer interface buries a large molecular surface (1224.7 Å<sup>2</sup>) as calculated by *Areaimol*. The  
176 interface is largely hydrophobic with 52 van der Waal contacts and two side chain hydrogen bonds. The  
177 side chain OE2 atom Glu66 for an intermolecular H-bond with the side chain ND2 atom of Asn28 from  
178 the other monomer. Besides residues Asn28 and Glu66, other residues that comprise the dimer  
179 interface are Thr23, Phe25, Val27, Lys126, Asn136, Ile137, Phe138, Thr140, and Val142.

180

## 181 **Supplementary References**

- 182 1. Oleson, J. D., Park, Y. L., Nowatzki, T. M. & Tollefson, J. J. Node-injury scale to evaluate root injury  
183 by corn rootworms (Coleoptera: Chrysomelidae). *J. Econ. Entomol.* **98**, 1-8 (2005).
- 184 2. Bermudez, E., Cong, R., Hou, J. T. & Yamamoto, T. Inventors; E.I. DuPont De Nemours and  
185 Company, assignee. Synthetic insecticidal proteins active against corn rootworm. US Patent  
186 Application 20120210462 A1 (16 August 2012).
- 187 3. Zhao, J. Z. *et al.* mCry3A-selected western corn rootworm colony exhibits high resistance and has  
188 reduced binding of mCry3A to midgut tissue. *J. Econ. Entomol.* **109**, 1369-1377 (2016).
- 189 4. Winn M. D. *et al.* Overview of CCP4 suite and current developments. *Acta Cryst.* **D67**, 235-242  
190 (2011).

| AfIP-1B,<br>ppm | AfIP-1A, ppm          |          |          |          |          |          |
|-----------------|-----------------------|----------|----------|----------|----------|----------|
|                 | 128                   | 32       | 8        | 2        | 0.5      | 0.13     |
| 128             | 2.7 ±0.5 <sup>a</sup> | 2.7 ±0.5 | 2.3 ±0.5 | 2.2 ±0.4 | 2.2 ±0.4 | 2.2 ±0.4 |
| 32              | 2.3 ±0.5              | 2.8 ±0.4 | 2.3 ±0.5 | 2.2 ±0.5 | 2.0 ±0.6 | 1.8 ±0.4 |
| 8               | 2.3 ±0.5              | 2.5 ±0.5 | 2.0 ±0.0 | 2.0 ±0.0 | 1.7 ±0.5 | 1.3 ±0.5 |
| 2               | 2.7 ±0.5              | 2.2 ±0.4 | 2.2 ±0.4 | 2.2 ±0.4 | 1.3 ±0.5 | 1.5 ±0.5 |
| 0.5             | 2.2 ±0.4              | 2.3 ±0.5 | 2.0 ±0.0 | 1.5 ±0.5 | 1.5 ±0.5 | 0.5 ±0.5 |
| 0.13            | 2.0 ±0.0              | 2.0 ±0.0 | 2.0 ±0.0 | 2.0 ±0.0 | 0.8 ±0.8 | 1.7 ±0.4 |

191

192 **Supplementary Table S1. Impact of dilutions of AfIP-1A and AfIP-1B on inhibition of WCR in diet assay.**

193 <sup>a</sup>Values are WCR inhibition scores: 3 (dead), 2 (severely stunted - little or no growth but alive), 1

194 (stunted - growth to 2<sup>nd</sup> instar but not equivalent to controls), or 0 (no activity). Data presented are the

195 mean of 6 replicates per treatment +/- SD. AfIP1A/1B doses with inhibition scores averaging less than 2

196 are shaded.

197

| <b>Source strain</b> | <b><i>AfIP-1A</i><br/>homolog</b> | <b>% pn<br/>Identity to<br/><i>AfIP-1A</i> pn</b> | <b>% pp<br/>Identity to<br/><i>AfIP-1A</i> pp</b> | <b><i>AfIP-1B</i><br/>homolog</b> | <b>% pn<br/>Identity to<br/><i>AfIP-1B</i> pn</b> | <b>% pp<br/>Identity to<br/><i>AfIP-1B</i> pp</b> |
|----------------------|-----------------------------------|---------------------------------------------------|---------------------------------------------------|-----------------------------------|---------------------------------------------------|---------------------------------------------------|
| DDMC-P4G7            | KU495732                          | -                                                 | -                                                 | KU495733                          | -                                                 | -                                                 |
| ATCC 15246           | KX550422                          | 100                                               | 100                                               | KX550429                          | 99.8                                              | 99.7                                              |
| ATCC 19209           | KX550427                          | 96.6                                              | 96.6                                              | KX550434                          | 94.3                                              | 97.0                                              |
| ATCC 43161           | KX550423                          | 99.5                                              | 100                                               | KX550430                          | 99.3                                              | 99.4                                              |
| ATCC 49677           | KX550428                          | 91.6                                              | 96.6                                              | KX550435                          | 94.4                                              | 97.0                                              |
| USDA B-2162          | KX550426                          | 99.5                                              | 100                                               | KX550433                          | 99.3                                              | 99.4                                              |
| USDA B-2542          | KX550425                          | 99.5                                              | 100                                               | KX550432                          | 99.3                                              | 99.4                                              |
| USDA B-41076         | KX550424                          | 100                                               | 100                                               | KX550431                          | 90.4                                              | 99.4                                              |

198

199 **Supplementary Table S2. Genbank accession codes of *AfIP-1A/1B* from *A. faecalis* strains. pn,**  
200 polynucleotide; pp, polypeptide.

201



---

| <b>Location</b> | <b>Planting date</b> | <b>Infestation date</b> | <b>Root evaluation date</b> |
|-----------------|----------------------|-------------------------|-----------------------------|
| Mankato, MN     | 14-May               | 5-June                  | 20-July                     |
| Rochelle, IL    | 14-May               | 8-June                  | 16-July                     |
| Janesville, WI  | 8-May                | 5-June                  | 24-July                     |

---

202

203 **Supplementary Table S3. Field testing locations, dates of key activities in 2012.**

| Location       | Treatment <sup>a</sup> | Estimated node-injury score <sup>b</sup> | 95% confidence intervals |       |
|----------------|------------------------|------------------------------------------|--------------------------|-------|
|                |                        |                                          | Lower                    | Upper |
| Rochelle, IL   | Event A                | 0.10 b                                   | 0.01                     | 0.54  |
|                | Event B                | 0.55 b                                   | 0.16                     | 1.17  |
|                | Event C                | 0.34 b                                   | 0.06                     | 0.84  |
|                | Event D                | 0.70 b                                   | 0.25                     | 1.37  |
|                | DAS-59122-7            | 0.34 b                                   | 0.12                     | 0.68  |
|                | Negative control       | 2.89 a                                   | 2.07                     | 3.84  |
| Janesville, WI | Event A                | 0.55 b                                   | 0.28                     | 0.92  |
|                | Event B                | 0.42 b                                   | 0.18                     | 0.76  |
|                | Event C                | 0.49 b                                   | 0.24                     | 0.83  |
|                | Event D                | 0.55 b                                   | 0.28                     | 0.91  |
|                | DAS-59122-7            | 0.45 b                                   | 0.25                     | 0.71  |
|                | Negative control       | 2.24 a                                   | 1.77                     | 2.78  |
| Mankato, MN    | Event A                | 0.40 b                                   | 0.13                     | 0.81  |
|                | Event B                | 0.26 bc                                  | 0.06                     | 0.62  |
|                | Event C                | 0.32 bc                                  | 0.09                     | 0.69  |
|                | Event D                | 0.28 bc                                  | 0.07                     | 0.64  |
|                | DAS-59122-7            | 0.26 bc                                  | 0.09                     | 0.52  |
|                | Negative control       | 2.13 a                                   | 1.43                     | 2.99  |

205

206 **Supplementary Table S4. Comparison of node-injury scores on back-transformed scale among**  
207 **treatments at 3 field locations in 2012.** <sup>a</sup>Events A, B, C, and D were experimental ZmAflP1A/1B events;  
208 only plants confirmed as single-copy for the event of interest were included in the analysis. The  
209 commercial event DAS-59122-7 was the positive control and the Negative control contained no events  
210 for control of corn rootworm. <sup>b</sup>Injury from corn rootworm larval feeding was assessed with root ratings  
211 on the Iowa State University 0-3 Node-Injury Scale. Within each location, estimated node-injury scores  
212 followed by different letters are significantly different ( $P < 0.05$ ).

213

214

| <b>Location</b> | <b>Source</b>     | <b><i>dfa</i></b> | <b><i>F</i> value</b> | <b><i>P-value</i><sup>b</sup></b> |
|-----------------|-------------------|-------------------|-----------------------|-----------------------------------|
| Rochelle, IL    | Treatment         | 3, 21             | 17.62                 | <0.01                             |
|                 | Treatment X Event | 3, 21.3           | 1.36                  | 0.28                              |
| Janesville, WI  | Treatment         | 3, 20.6           | 39.43                 | <0.01                             |
|                 | Treatment X Event | 3, 21.7           | 0.23                  | 0.88                              |
| Mankato, MN     | Treatment         | 3, 19.8           | 23.43                 | <0.01                             |
|                 | Treatment X Event | 3, 20.6           | 1.261                 | 0.32                              |

215

216 **Supplementary Table S5. Fixed effects of treatment and treatment x event on square-root**  
217 **transformed node-injury scores from field evaluations at 3 locations in 2012.** <sup>a</sup>*df*, numerator degrees of  
218 freedom, denominator degrees of freedom. <sup>b</sup>*F*-test considered significant difference if the *P*-value is less  
219 than 0.05.

220

| Location         | Effect                            | Estimate | Standard error | Z-ratio <sup>a</sup> |
|------------------|-----------------------------------|----------|----------------|----------------------|
| Across locations | Location                          | 0.000    | 0.006          | 0.057                |
|                  | Location X Replication            | 0.010    | 0.009          | 1.129                |
|                  | Location X Treatment              | 0.000    |                | N/A                  |
|                  | Location X Event(Treatment)       | 0.000    |                | N/A                  |
|                  | at(location, Rochelle):Plot       | 0.085    | 0.030          | 2.828                |
|                  | at(location, Janesville):Plot     | 0.018    | 0.009          | 2.097                |
|                  | at(location, Mankato):Plot        | 0.034    | 0.015          | 2.306                |
|                  | at(location, Rochelle):Residual   | 0.033    | 0.005          | 6.326                |
|                  | at(location, Janesville):Residual | 0.033    | 0.005          | 6.743                |
|                  | at(location, Mankato):Residual    | 0.037    | 0.006          | 6.254                |
| Rochelle, IL     | Replication                       | 0.000    |                | N/A                  |
|                  | Plot                              | 0.077    | 0.030          | 2.585                |
|                  | Residual                          | 0.033    | 0.005          | 6.326                |
| Janesville, WI   | Replication                       | 0.018    | 0.021          | 0.840                |
|                  | Plot                              | 0.019    | 0.009          | 2.061                |
|                  | Residual                          | 0.033    | 0.005          | 6.743                |
| Mankato, MN      | Replication                       | 0.006    | 0.013          | 0.445                |
|                  | Plot                              | 0.042    | 0.020          | 2.141                |
|                  | Residual                          | 0.037    | 0.006          | 6.251                |

221

222

223

224

225

226

**Supplementary Table S6. Random effects from the across-location and by-location analyses on square-root transformed node-injury scores from field evaluations at 3 locations in 2012.** <sup>a</sup>Z-ratio is the ratio between the estimate of the random effect and its own standard error. The effect is considered significantly greater than 0 if Z-ratio is greater than 2.

| Data collection                           | Data set 1          | Data set 2                           |
|-------------------------------------------|---------------------|--------------------------------------|
| Space group                               | $P2_1$              | $P2_1$                               |
| Resolution (Å)                            | 2.0                 | 1.8                                  |
| Cell dimensions                           |                     |                                      |
| a, b, c (Å)                               | 59.22, 34.42, 71.38 | 59.29, 34.42, 71.44                  |
| a, b, $\gamma$ (°)                        | 90, 96.65, 90       | 90, 96.54, 90                        |
| Wavelength (Å)                            | 0.97869             | 0.97869                              |
| Resolution (Å)                            | 2.0 (2.02-1.99)*    | 1.80 (1.83-1.80)*                    |
| Reflections                               | 19256 (595)         | 26266 (1238)                         |
| R <sub>merge</sub> (%)                    | 15.2 (20.8)         | 9.6 (49.6)                           |
| Completeness (%)                          | 96.0 (59.7)         | 97.4 (96.0)                          |
| I/sigmaI                                  | 22.20 (6.71)        | 14.81 (2.06)                         |
| Redundancy                                | 7.1 (3.0)           | 3.8 (3.8)                            |
| Refinement                                |                     |                                      |
| Resolution (Å)                            |                     | 1.8                                  |
| No. reflections                           |                     | 26255                                |
| R <sub>work</sub> / R <sub>tree</sub> (%) |                     | 21.51 / 26.76                        |
| No. atoms                                 |                     |                                      |
| Protein                                   |                     | 2258                                 |
| Water                                     |                     | 272                                  |
| B-factors (Å <sup>2</sup> )               |                     |                                      |
| Protein                                   |                     | 24.32                                |
| Water                                     |                     | 30.62                                |
| R.m.s. deviations                         |                     |                                      |
| Bond lengths (Å)                          |                     | 0.0179                               |
| Bond angles (°)                           |                     | 1.873                                |
| Molprobrity                               |                     |                                      |
| Clash score <sup>#</sup>                  |                     | 7.99 (86th percentile <sup>¥</sup> ) |
| Molprobrity score <sup>^</sup>            |                     | 2.06 (58th percentile <sup>¥</sup> ) |
| Ramachandran plot <sup>Δ</sup>            |                     |                                      |
| Favored                                   |                     | 94.31%                               |
| Allowed                                   |                     | 99.29%                               |
| Outliers                                  |                     | 0.71%                                |

227  
228 **Supplementary Table S7. AfIP-1A crystallography structure data collection and refinement statistics.**  
229 \*Values in parentheses are for highest-resolution shell. <sup>¥</sup>100<sup>th</sup> percentile is the best among structures of  
230 comparable resolution; 0<sup>th</sup> percentile is the worst. For clashscore the comparative set of structures was  
231 selected in 2004 (N=837, 1.80 Å ± 0.25 Å), for MolProbrity score in 2006 (N=11444, 1.80 Å ± 0.25 Å).  
232 <sup>^</sup>MolProbrity score combines the clashscore, rotamer, and Ramachandran evaluations into a single score,  
233 normalized to be on the same scale as X-ray resolution. <sup>#</sup>Clashscore is the number of serious steric  
234 overlaps (> 0.4 Å) per 1000 atoms. <sup>Δ</sup>Ramachandran analysis was done with Molprobrity. The 4 outliers  
235 (residues 129 and 131 in both molecules in the asymmetric units) are all in a very flexible surface loop.  
236

| A chain |          |      | B chain |          |      | Distance |     |      |     |
|---------|----------|------|---------|----------|------|----------|-----|------|-----|
| Residue | Position | Atom | Residue | Position | Atom | (Å)      |     |      |     |
| Thr     | 23A      | OG1  | ...     | Lys      | 126B | CD       | ... | 3.69 |     |
| Phe     | 25A      | CG   | ...     | Thr      | 140B | CG2      | ... | 3.98 |     |
| Phe     | 25A      | CD1  | ...     | Thr      | 140B | CG2      | ... | 3.77 |     |
| Phe     | 25A      | CE1  | ...     | Thr      | 140B | CB       | ... | 3.88 |     |
|         |          |      | ...     | Thr      | 140B | CG2      | ... | 4.01 |     |
| Phe     | 25A      | CZ   | ...     | Val      | 142B | CG2      | ... | 3.69 |     |
| Phe     | 25A      | CE2  | ...     | Phe      | 25B  | CE2      | ... | 3.87 |     |
|         |          |      | ...     | Phe      | 25B  | CD2      | ... | 4.02 |     |
|         |          |      | ...     | Val      | 27B  | CG2      | ... | 3.86 |     |
| Phe     | 25A      | CD2  | ...     | Phe      | 25B  | CE2      | ... | 3.91 |     |
|         |          |      | ...     | Phe      | 25B  | CD2      | ... | 4.00 |     |
| Val     | 27A      | CG1  | ...     | Glu      | 66B  | CD       | ... | 4.08 |     |
|         |          |      | ...     | Glu      | 66B  | OE2      | ... | 3.32 |     |
| Val     | 27A      | CG2  | ...     | Phe      | 25B  | CE2      | ... | 4.02 |     |
| Asn     | 28A      | CG   | ...     | Glu      | 66B  | OE2      | ... | 3.41 |     |
| Asn     | 28A      | ND2  | ...     | Glu      | 66B  | CD       | ... | 3.57 |     |
|         |          |      | ...     | Glu      | 66B  | OE2      | ... | 2.53 | *** |
| Glu     | 66A      | CG   | ...     | Val      | 27B  | CG1      | ... | 1.10 |     |
| Glu     | 66A      | CD   | ...     | Asn      | 28B  | ND2      | ... | 3.46 |     |
|         |          |      | ...     | Val      | 142B | CG1      | ... | 3.85 |     |
| Glu     | 66A      | OE1  | ...     | Asn      | 28B  | ND2      | ... | 3.45 | *   |
|         |          |      | ...     | Val      | 142B | CG1      | ... | 3.27 |     |
| Glu     | 66A      | OE2  | ...     | Asn      | 28B  | CG       | ... | 3.69 |     |
|         |          |      | ...     | Asn      | 28B  | ND2      | ... | 2.97 | *** |
| Lys     | 126A     | CB   | ...     | Phe      | 138B | CE1      | ... | 3.79 |     |
| Asn     | 136A     | CB   | ...     | Phe      | 138B | CE2      | ... | 3.69 |     |
| Asn     | 136A     | C    | ...     | Phe      | 138B | CE2      | ... | 3.89 |     |
| Ile     | 137A     | C    | ...     | Phe      | 138B | CZ       | ... | 4.03 |     |
|         |          |      | ...     | Phe      | 138B | CE2      | ... | 3.85 |     |
| Phe     | 138A     | CB   | ...     | Phe      | 138B | CZ       | ... | 3.37 |     |
|         |          |      | ...     | Phe      | 138B | CE2      | ... | 3.61 |     |
|         |          |      | ...     | Phe      | 138B | CD2      | ... | 3.71 |     |
|         |          |      | ...     | Phe      | 138B | CG       | ... | 3.56 |     |
|         |          |      | ...     | Phe      | 138B | CD1      | ... | 3.33 |     |
|         |          |      | ...     | Phe      | 138B | CE1      | ... | 3.23 |     |
| Phe     | 138A     | CG   | ...     | Phe      | 138B | CB       | ... | 4.00 |     |
|         |          |      | ...     | Phe      | 138B | CG       | ... | 3.63 |     |
|         |          |      | ...     | Phe      | 138B | CD1      | ... | 3.50 |     |
|         |          |      | ...     | Phe      | 138B | CE1      | ... | 3.92 |     |
| Phe     | 138A     | CE1  | ...     | Thr      | 140B | CG2      | ... | 4.01 |     |
| Phe     | 138A     | CZ   | ...     | Phe      | 25B  | CB       | ... | 4.02 |     |
|         |          |      | ...     | Thr      | 140B | CG2      | ... | 3.77 |     |
| Phe     | 138A     | CD2  | ...     | Phe      | 138B | CB       | ... | 4.01 |     |
|         |          |      | ...     | Phe      | 138B | CG       | ... | 3.80 |     |
|         |          |      | ...     | Phe      | 138B | CD1      | ... | 3.31 |     |
|         |          |      | ...     | Phe      | 138B | CE1      | ... | 3.88 |     |
| Thr     | 140A     | CB   | ...     | Phe      | 25B  | CE1      | ... | 3.82 |     |
| Thr     | 140A     | CG2  | ...     | Phe      | 25B  | CE1      | ... | 3.87 |     |
|         |          |      | ...     | Phe      | 25B  | CG       | ... | 3.93 |     |
|         |          |      | ...     | Phe      | 25B  | CD1      | ... | 3.74 |     |
| Val     | 142A     | CG1  | ...     | Glu      | 66B  | CD       | ... | 3.57 |     |
|         |          |      | ...     | Glu      | 66B  | OE1      | ... | 3.43 |     |
|         |          |      | ...     | Glu      | 66B  | OE2      | ... | 3.68 |     |
| Val     | 142A     | CG2  | ...     | Phe      | 25B  | CZ       | ... | 3.88 |     |

237 **Supplementary Table S8. Interactions between the two monomers of AfIP-1A.**

\*Close contacts across dimer interface

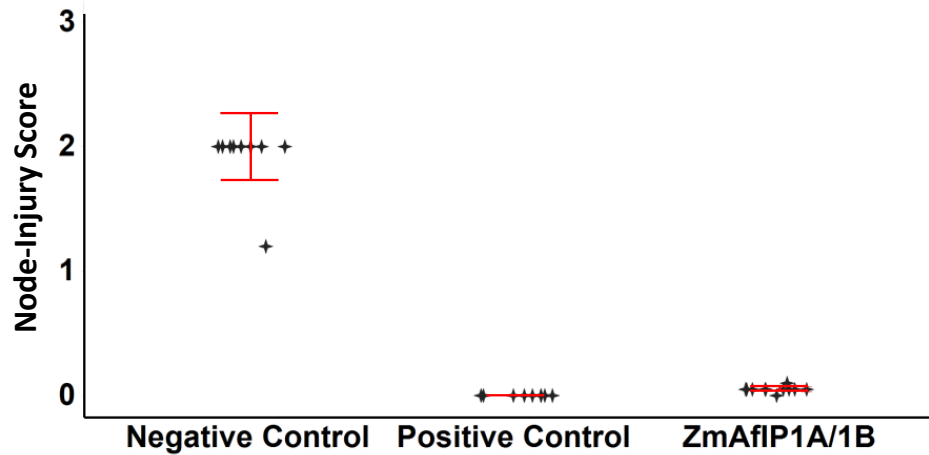

239

240 **Supplementary Figure S1. Root protection of T0 generation ZmAfIP1A/1B transgenic maize plants**  
 241 **against feeding by WCR.** Seedlings of 11 independent transformation events expressing single gene  
 242 copies of *AfIP-1A* and *AfIP-1B* were infested with WCR in a greenhouse at the V3-V4 stage. Root feeding  
 243 damage was scored at ~V7 as described previously<sup>1</sup> and compared to positive control events expressing  
 244 *Cry34/35* (n=9) and non-transgenic maize (n=9). Error bars indicate 95% confidence intervals.

245

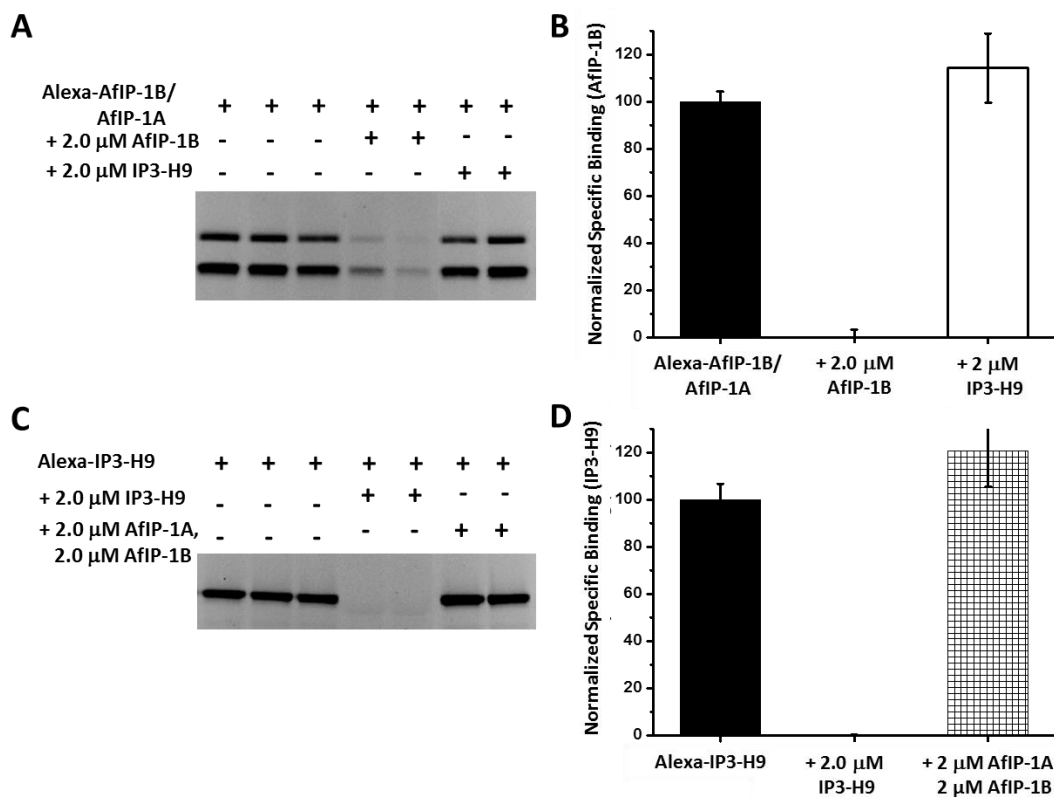

247

248 **Supplementary Figure S2.** Distinct sites of binding of AfIP-1A/1B and Cry3A to BBMV from WCR midgut

249 tissue. (A) In-gel fluorescence after incubation of BBMV (5  $\mu$ g) with Alexa-AfIP-1B (10 nM) with AfIP-1A

250 (100 nM), in the absence or presence of an excess of Cry3A (IP3-H9) or AfIP-1B. (C) Reciprocal

251 heterologous competition assay against Alexa-IP3-H9 (5 nM) binding in the absence or presence of an

252 excess of IP3-H9 or AfIP-1B. Normalized specific binding of AfIP-1B (B) and IP3-H9 (D) based on optical

253 densitometry of gel images represented in (A) and (B) after subtraction of nonspecific binding as

254 described in SI Materials and Methods. The data presented in bar graphs are the average and SEM of 3

255 experiments each consisting of 2 or determinations.

256



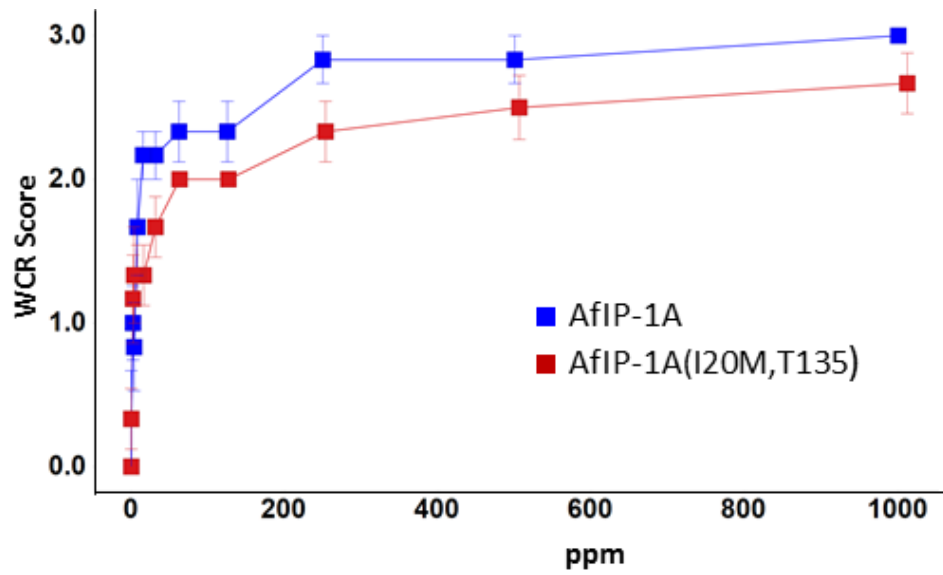

257

258 **Supplementary Figure S3.** Activity of AfIP-1A double mutant against WCR. C-terminally 6xHis-tagged  
 259 wild-type AfIP-1A and AfIP-1A(I20M, T135M) were used in the diet bioassay in the presence of 100 ppm  
 260 AfIP-1B. The scores were noted as dead (3), severely stunted (2) (little or no growth but alive), stunted  
 261 (1) (growth to second instar but not equivalent to controls), or no observed activity (0). The data  
 262 presented are the average and SEM of 6 replicates.
